# Supplementary material for: Efficacy of mitral valve repair in combination with coronary revascularization for moderate ischaemic mitral regurgitation: a systematic review and meta-analysis of randomized controlled trials
Source: PubMed Central journal article supplement (PMC11175805; doi:10.1097/js9.0000000000001277), 2024-03-19
Supplement: js9-110-3879-s004.pdf [file js9-110-3879-s004.pdf]

# **Efficacy of mitral valve repair in combination with coronary revascularization for moderate ischemic mitral regurgitation: a systematic review and meta-analysis of randomized controlled trials**

## **Supplemental data**

### **Content**

|                                         |           |
|-----------------------------------------|-----------|
| <b>Search results.....</b>              | <b>2</b>  |
| <b>Risk of bias assessment.....</b>     | <b>4</b>  |
| <b>Publication bias assessment.....</b> | <b>5</b>  |
| <b>Sensitivity analysis.....</b>        | <b>13</b> |
| <b>GRADE assessment.....</b>            | <b>15</b> |

## Search results

| Strategy                                                                                                                                                                  | Databases                                    | Final date of searching |
|---------------------------------------------------------------------------------------------------------------------------------------------------------------------------|----------------------------------------------|-------------------------|
| (Ischemic OR functional OR secondary) AND (mitral regurgitation OR mitral incompetence OR mitral insufficiency OR mitral dysfunction) AND (randomized OR clinical trials) | PubMed, Web of Science, and Cochrane Library | Oct. 5, 2023            |

| Included studies [1-6] | Excluded studies [7-14]                                                                                                                                                       |
|------------------------|-------------------------------------------------------------------------------------------------------------------------------------------------------------------------------|
|                        | Reasons for exclusion<br>Patients had mixed MR etiologies [7, 8, 12, 13, 14]<br>The grade of IMR was severe [9, 11]<br>comparison was MVR + CABG vs. CABG + LV reshaping [10] |

### Potential eligible studies[1-14]

1. Bouchard D, Jensen H, Carrier M, et al. Effect of systematic downsizing rigid ring annuloplasty in patients with moderate ischemic mitral regurgitation. *J Thorac Cardiovasc Surg.* 2014;147:1471-7.
2. Chan KM, Punjabi PP, Flather M, et al. Coronary artery bypass surgery with or without mitral valve annuloplasty in moderate functional ischemic mitral regurgitation: final results of the Randomized Ischemic Mitral Evaluation (RIME) trial. *Circulation.* 2012;126:2502-10.
3. Fattouch K, Guccione F, Sampognaro R, et al. POINT: Efficacy of adding mitral valve restrictive annuloplasty to coronary artery bypass grafting in patients with moderate ischemic mitral valve regurgitation: a randomized trial. *J Thorac Cardiovasc Surg.* 2009;138:278-85.
4. Kareva YE, Efendiev VU, Rakhmonov SS, et al. [Long-Term Survival of Patients with Ischemic Heart Disease After Surgical Correction of Moderate Ischemic Mitral Regurgitation]. *Kardiologiya.* 2019;59:13-19.
5. Khallaf A, Elzayadi M, Alkady H, et al. Results of Coronary Artery Bypass Grafting Alone Versus Combined Surgical Revascularization and Mitral Repair In Patients with Moderate Ischemic Mitral Regurgitation. *Heart Surg Forum.* 2020;23:E270-E275.
6. Smith PK, Puskas JD, Ascheim DD, et al. Surgical treatment of moderate ischemic mitral regurgitation. *N Engl J Med.* 2014;371:2178-88.
7. Feldman T, Foster E, Glower DD, et al. Percutaneous repair or surgery for mitral

- regurgitation. *N Engl J Med*. 2011;364:1395-406.
8. Acker MA, Bolling S, Shemin R, et al. Mitral valve surgery in heart failure: insights from the Acorn Clinical Trial. *J Thorac Cardiovasc Surg*. 2006;132:568-77, 577.e1-4.
  9. Acker MA, Parides MK, Perrault LP, et al. Mitral-valve repair versus replacement for severe ischemic mitral regurgitation. *N Engl J Med*. 2014;370:23-32.
  10. Grossi EA, Patel N, Woo YJ, et al. Outcomes of the RESTOR-MV Trial (Randomized Evaluation of a Surgical Treatment for Off-Pump Repair of the Mitral Valve). *J Am Coll Cardiol*. 2010;56:1984-93.
  11. Nappi F, Lusini M, Spadaccio C, et al. Papillary Muscle Approximation Versus Restrictive Annuloplasty Alone for Severe Ischemic Mitral Regurgitation. *J Am Coll Cardiol*. 2016;67:2334-2346.
  12. Obadia JF, Messika-Zeitoun D, Leurent G, et al. Percutaneous Repair or Medical Treatment for Secondary Mitral Regurgitation. *N Engl J Med*. 2018;379:2297-2306.
  13. Stone GW, Lindenfeld J, Abraham WT, et al. Transcatheter Mitral-Valve Repair in Patients with Heart Failure. *N Engl J Med*. 2018;379:2307-2318.
  14. Witte KK, Lipiecki J, Siminiak T, et al. The REDUCE FMR Trial: A Randomized Sham-Controlled Study of Percutaneous Mitral Annuloplasty in Functional Mitral Regurgitation. *JACC Heart Fail*. 2019;7:945-955.

### Risk of bias assessment (ROB 2 Tool)

| Intention-to-treat | Unique ID     | Study ID | Experimental | Comparator | Outcome | Weight | D1 | D2 | D3 | D4 | D5 | Overall |   |               |
|--------------------|---------------|----------|--------------|------------|---------|--------|----|----|----|----|----|---------|---|---------------|
|                    | Smith 2014    | HA       | MVR + CABG   | CABG alone | NA      | 1      | +  | +  | +  | +  | +  | +       | + | Low risk      |
|                    | Fattouch 2009 | HA       | MVR + CABG   | CABG alone | NA      | 1      | +  | +  | +  | +  | +  | +       | + | Some concerns |
|                    | Chan 2012     | HA       | MVR + CABG   | CABG alone | NA      | 1      | +  | +  | +  | +  | +  | +       | + | High risk     |
|                    | Bouchard 2014 | HA       | MVR + CABG   | CABG alone | NA      | 1      | +  | +  | +  | +  | +  | +       | + |               |
|                    | Kareva 2019   | HA       | MVR + CABG   | CABG alone | NA      | 1      | +  | +  | +  | +  | +  | +       | + |               |
|                    | Khalilaf 2020 | HA       | MVR + CABG   | CABG alone | NA      | 1      | !  | +  | +  | +  | +  | !       | ! |               |

  

|    |                          |
|----|--------------------------|
| D1 | Randomisation process    |
| D2 | Deviations from the int  |
| D3 | Missing outcome data     |
| D4 | Measurement of the outco |
| D5 | Selection of the reporte |

Figure S1. Original figure of ROB assessment. Distribution of the bias for each study.

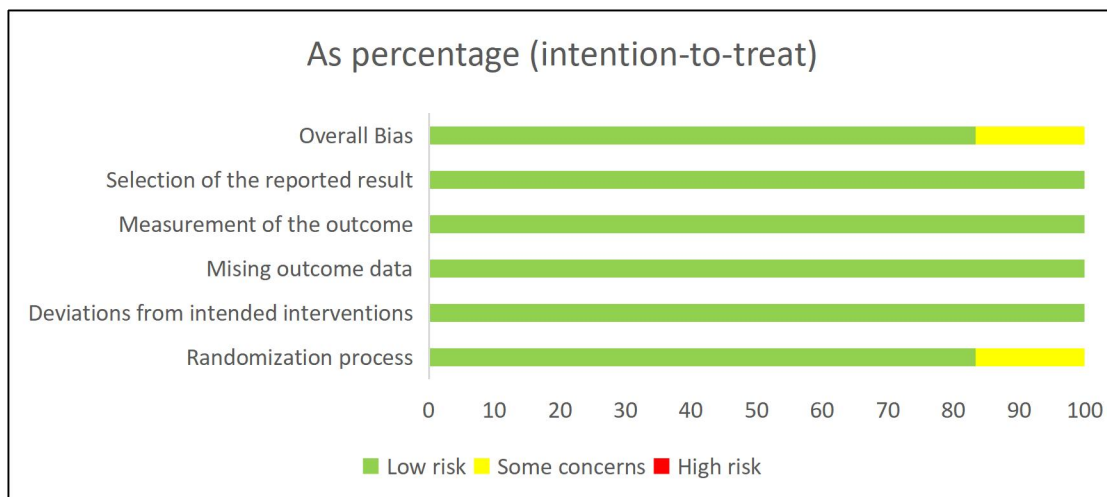

Figure S2. Original figure of ROB assessment. Summary of the risk of bias

## Publication bias assessment

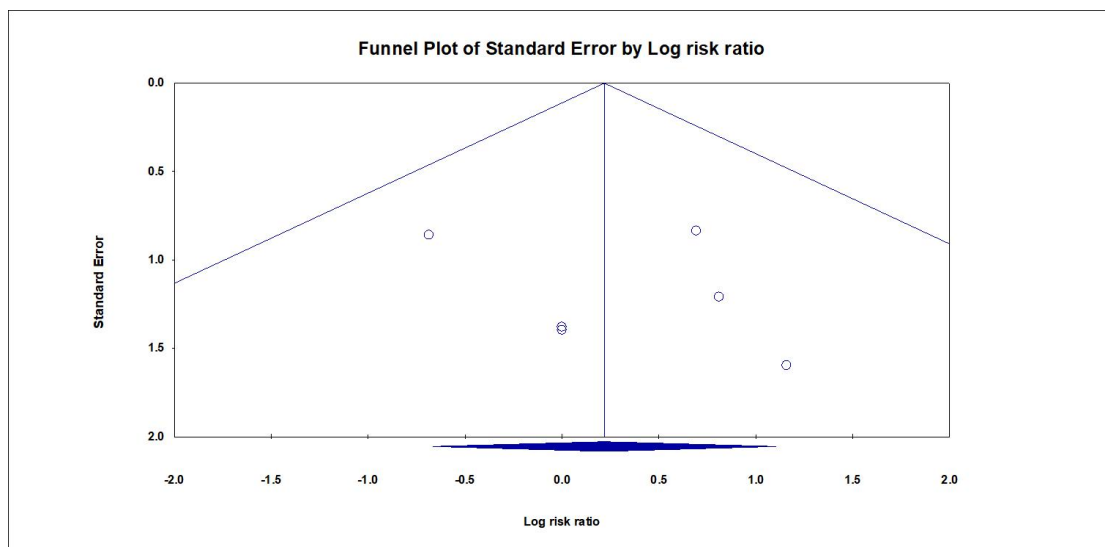

Figure S3. Funnel plot for operative mortality.

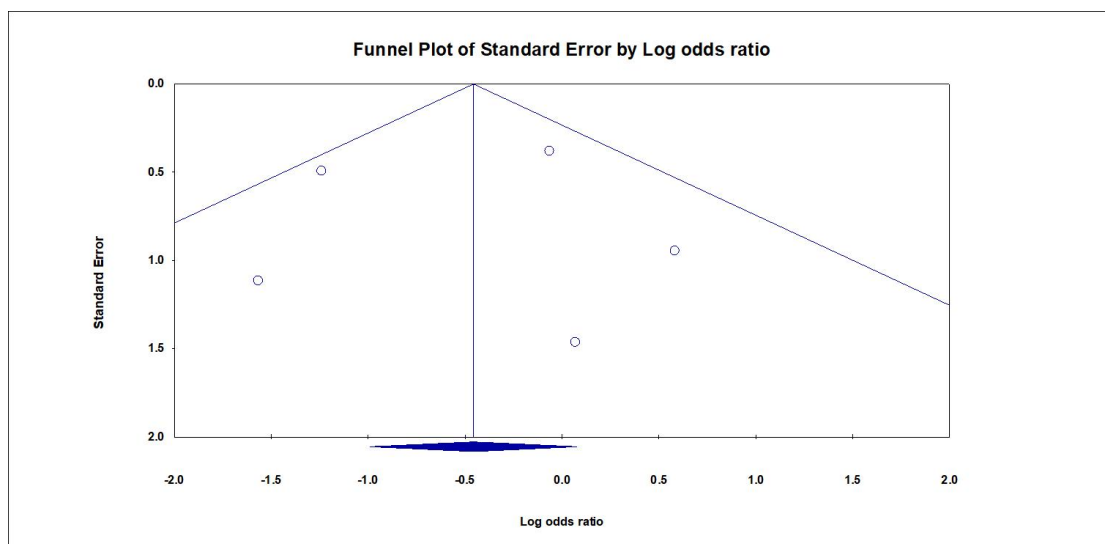

Figure S4. Funnel plot for long-term mortality.

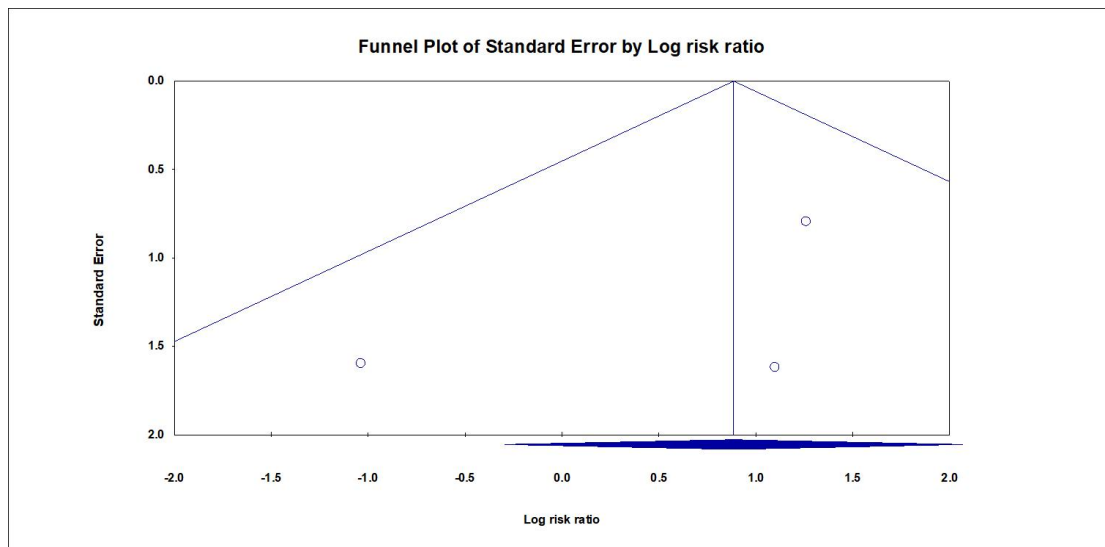

Figure S5. Funnel plot for stroke.

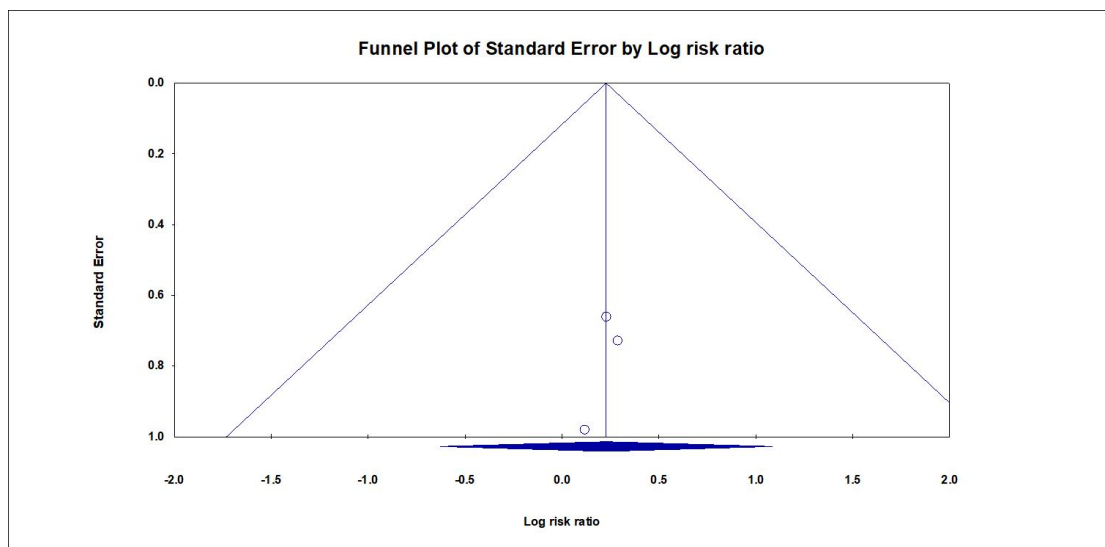

Figure S6. Funnel plot for worsening renal function.

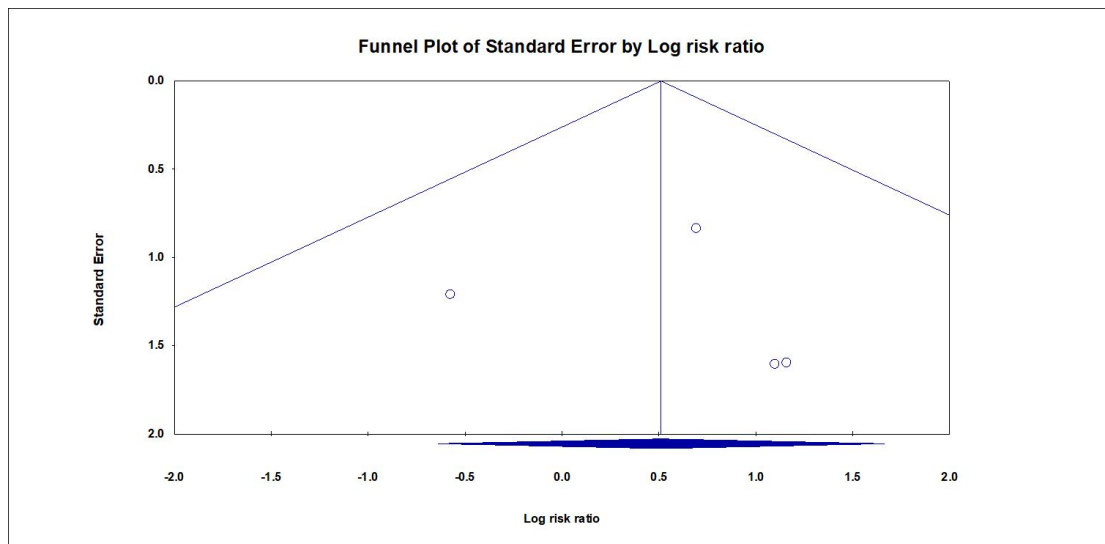

Figure S7. Funnel plot for reoperation for bleeding or tamponade.

| Table S3. Quantitative assessment of publication bias for each outcome |                     |                     |        |       |                                       |
|------------------------------------------------------------------------|---------------------|---------------------|--------|-------|---------------------------------------|
| Method                                                                 | Operative mortality | Long-term mortality | Stroke | WRF   | Reoperation for bleeding or tamponade |
| Begg's test                                                            | 0.260               | 0.806               | 1.000  | 1.000 | 0.734                                 |
| Egger's test                                                           | 0.223               | 0.669               | 0.364  | 0.397 | 0.419                                 |

WRF: worsening renal function. All values indicate the P-values.

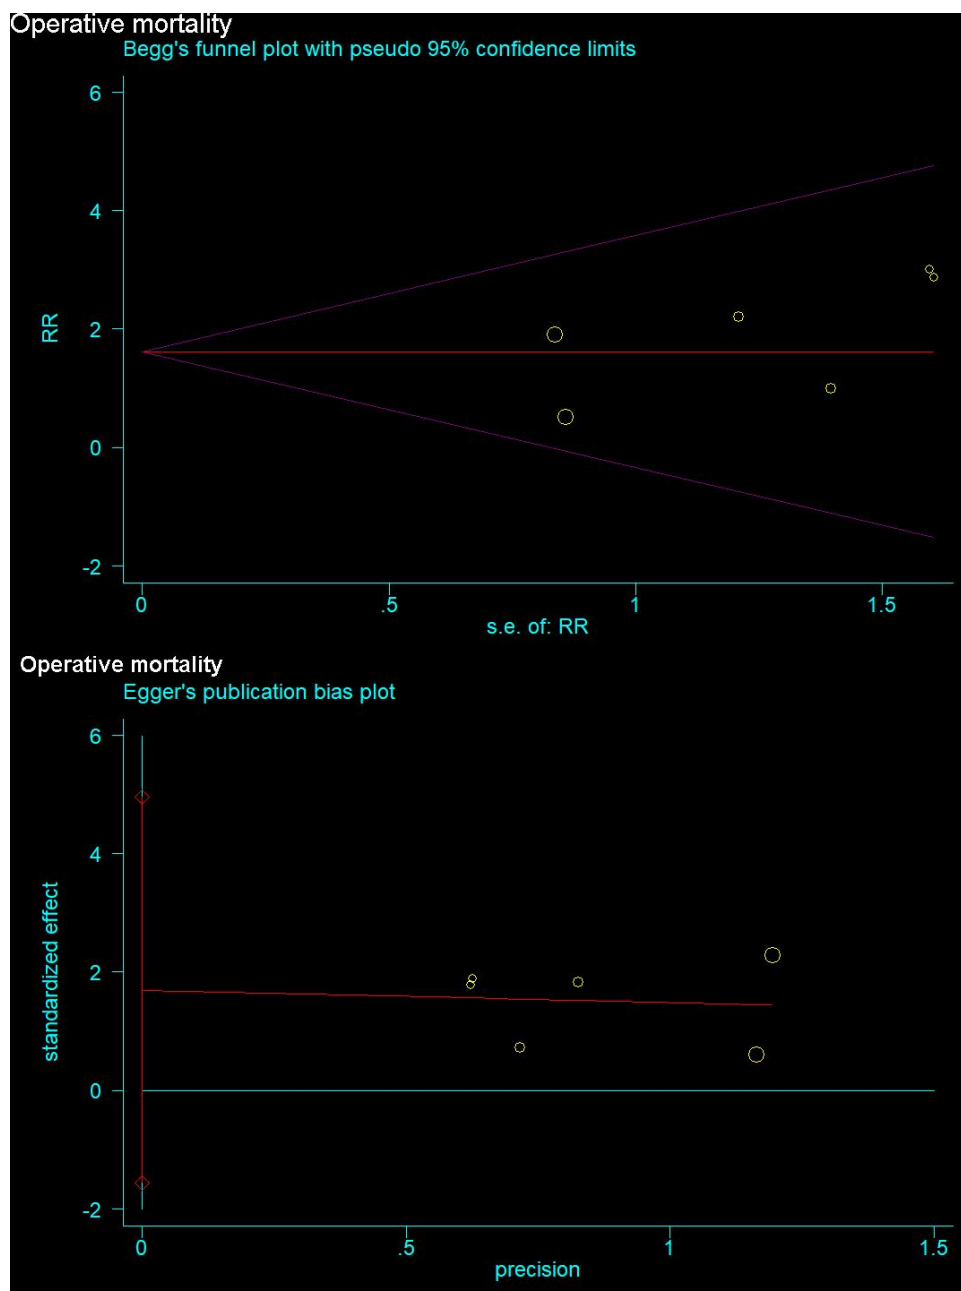

Figure S8. Plots of Begg's and Egger's tests for operative mortality.



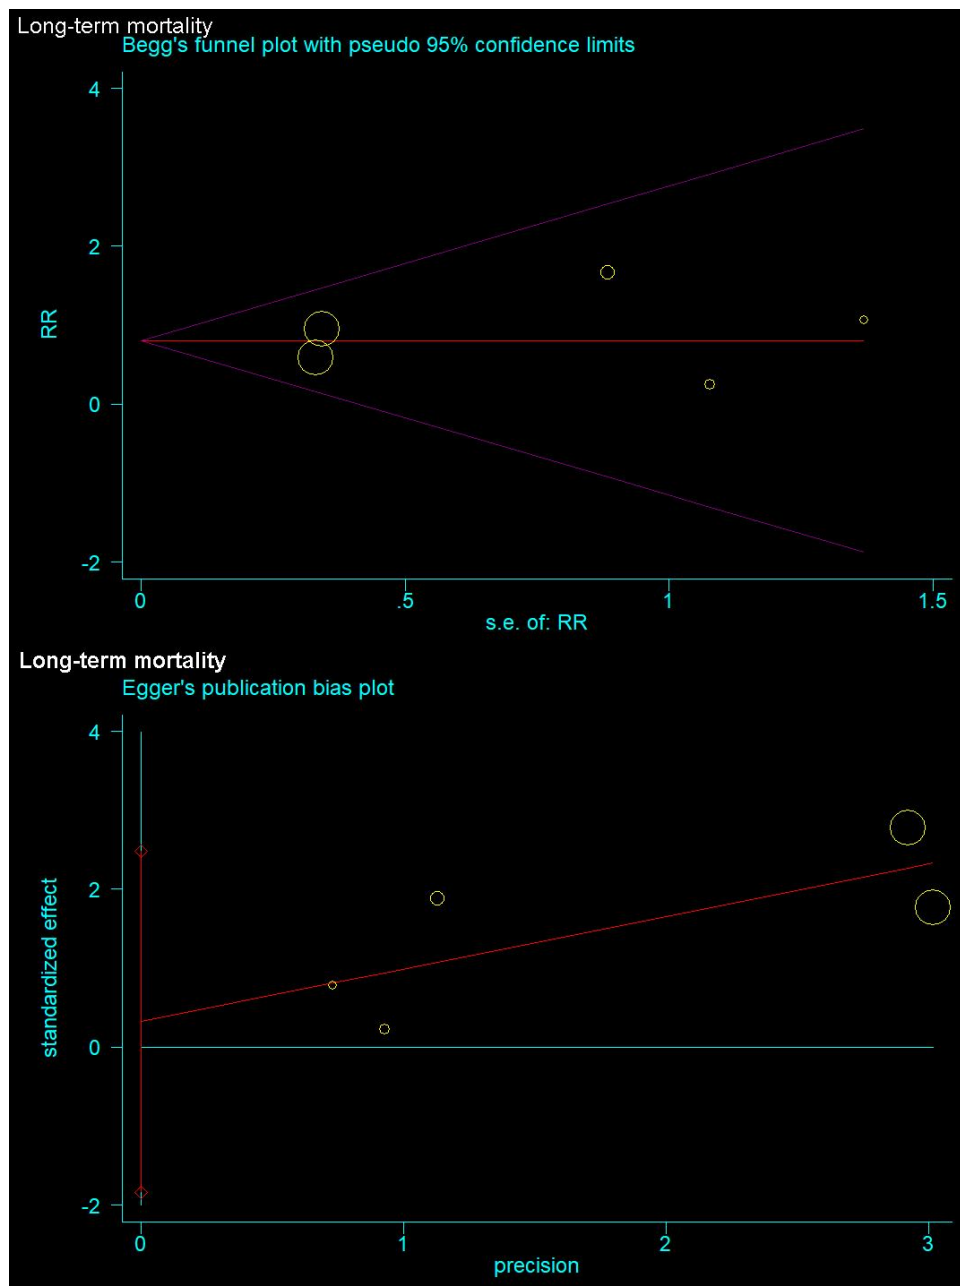

Figure S9. Plots of Begg's and Egger's tests for long-term mortality.

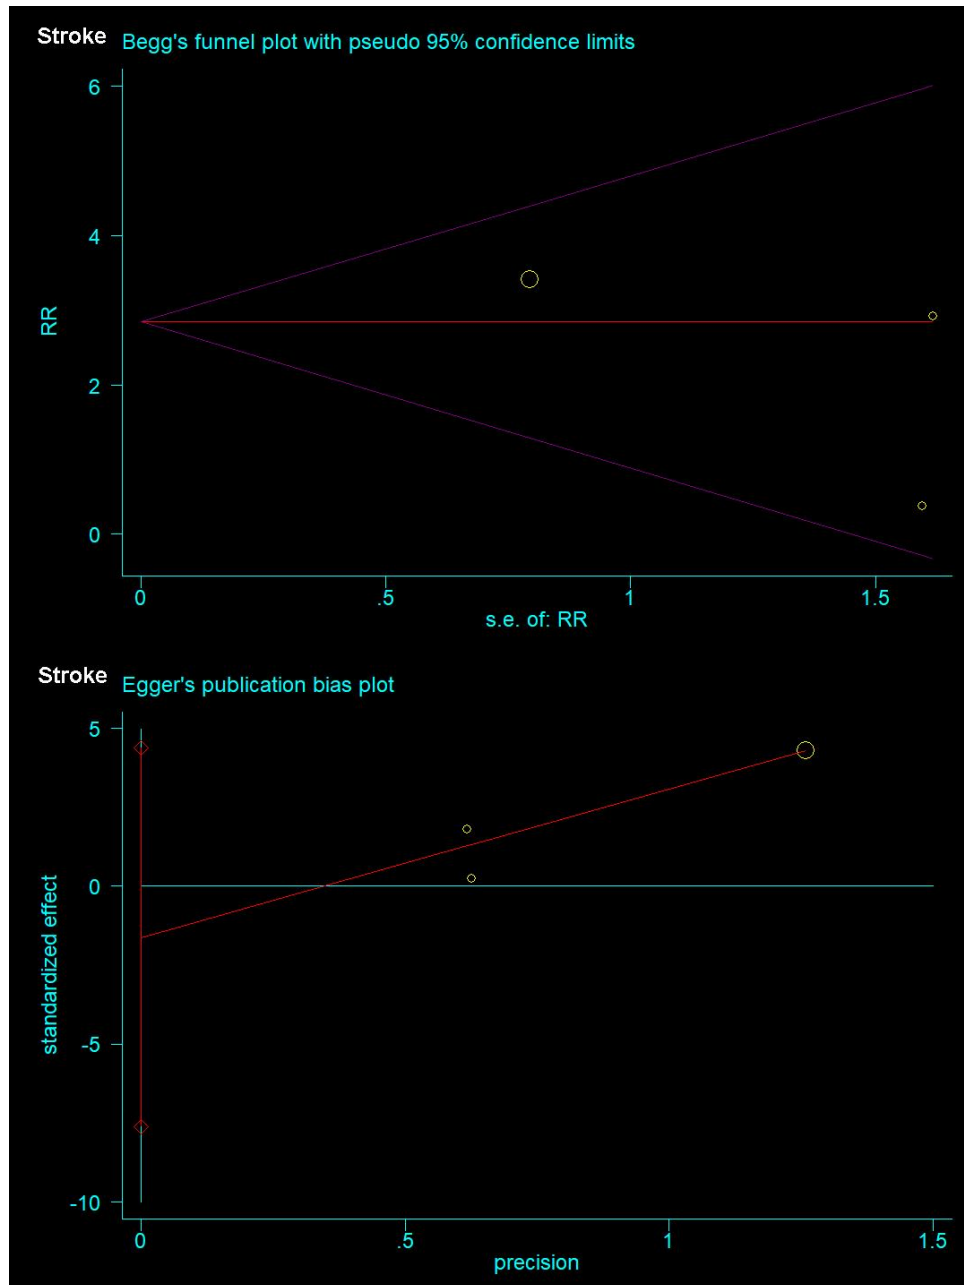

Figure S10. Plots of Begg's and Egger's tests for stroke.

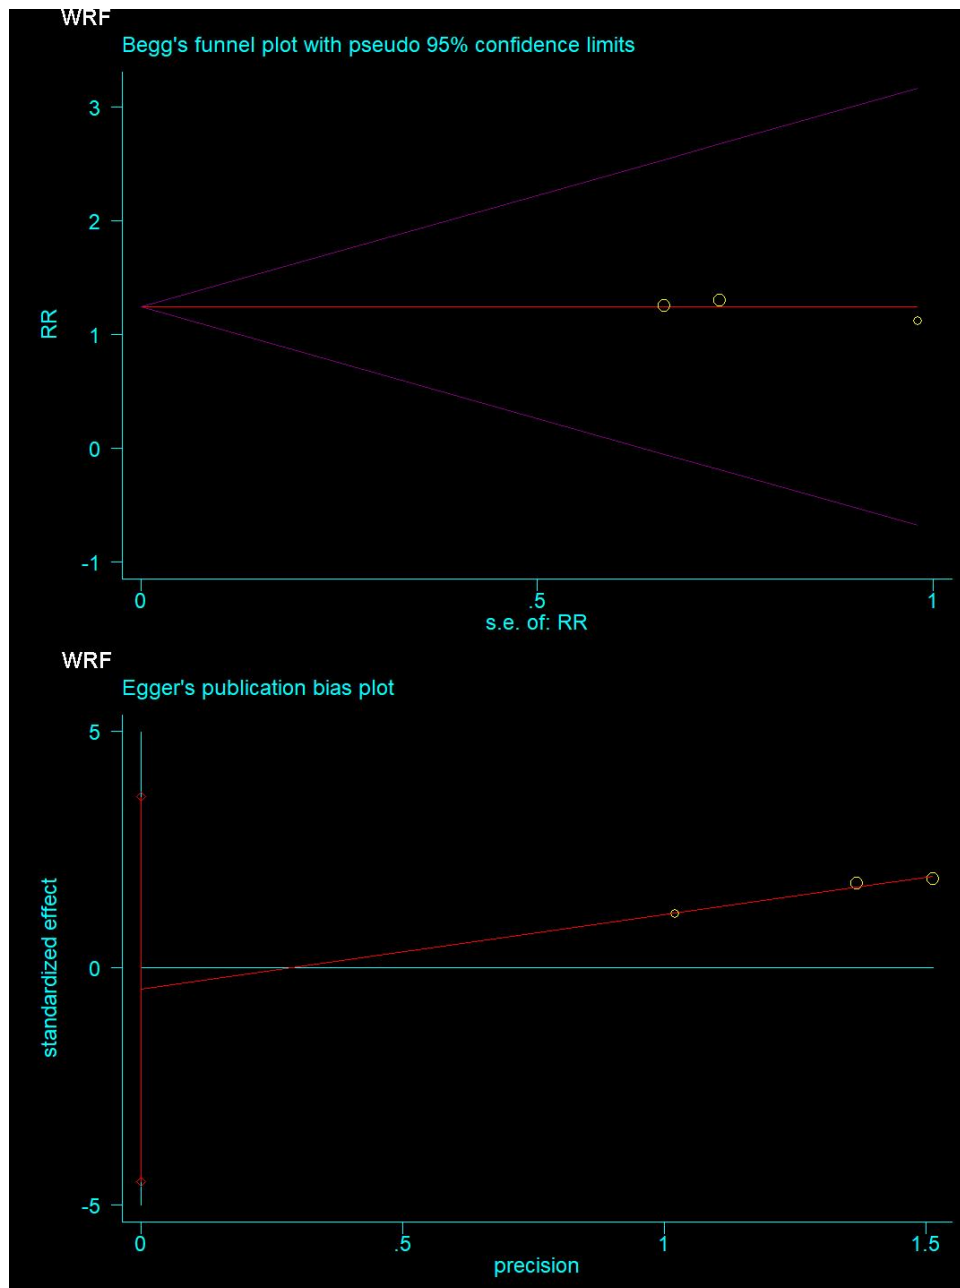

Figure S11. Plots of Begg's and Egger's tests for worsening renal function.

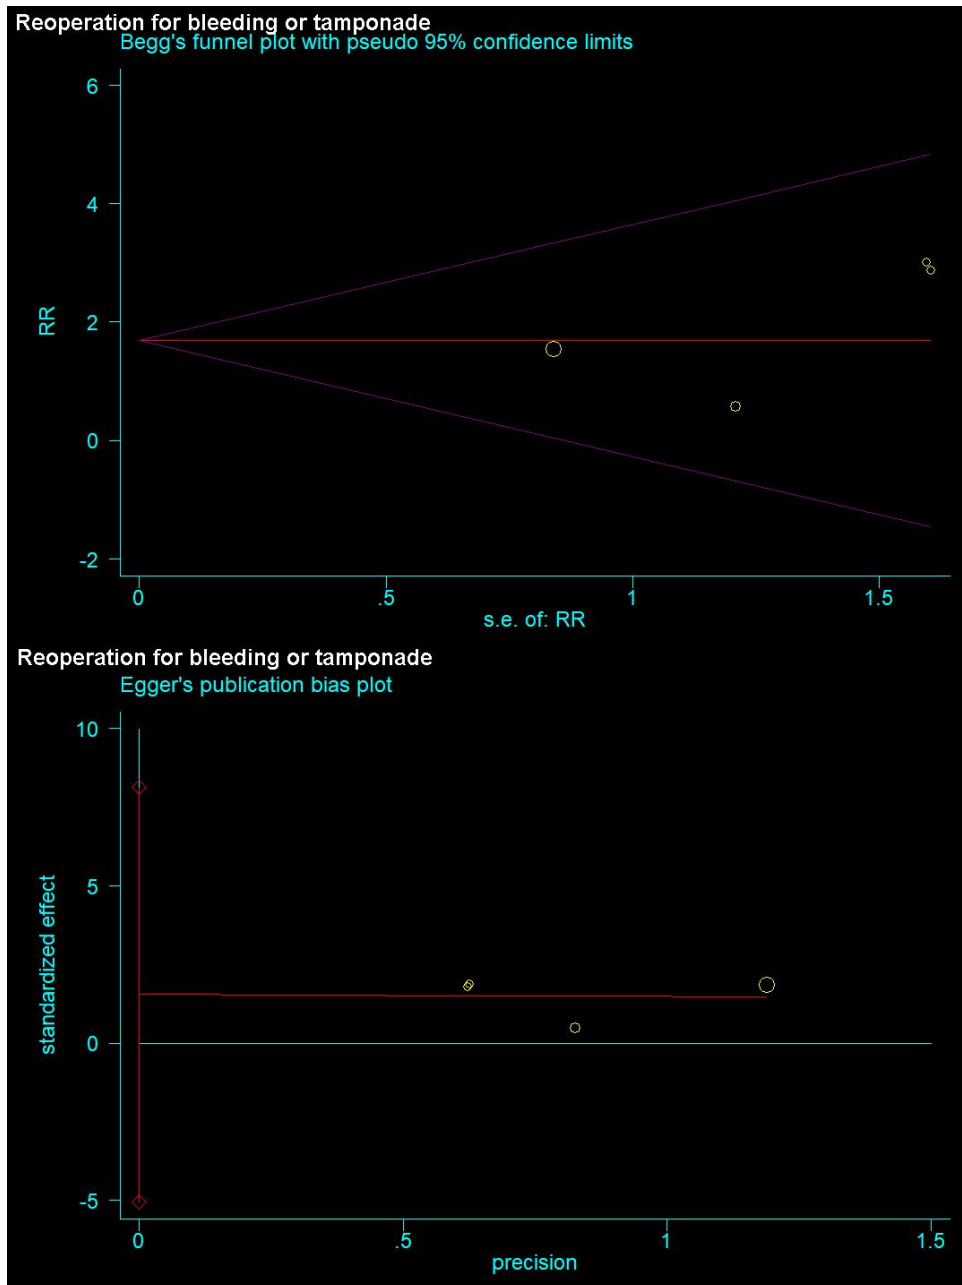

Figure S12. Plots of Begg's and Egger's tests for reoperation for bleeding or tamponade.

## Sensitivity analysis

### Operative mortality

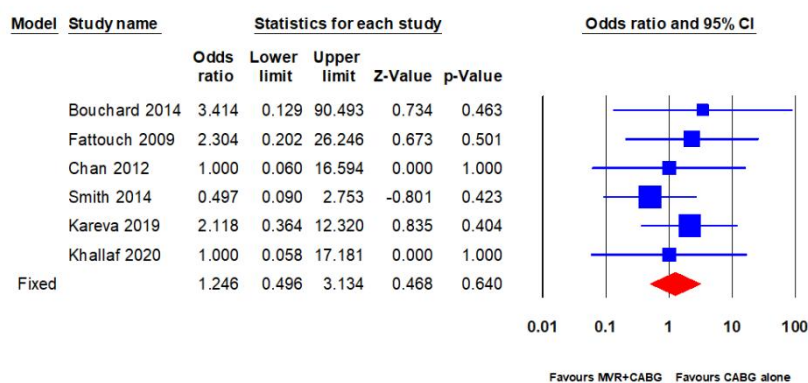

The summary statistic is odds ratio

Figure S13. Plot of sensitivity analysis for operative mortality. The summary statistic is odds Ratio

### Long-term mortality

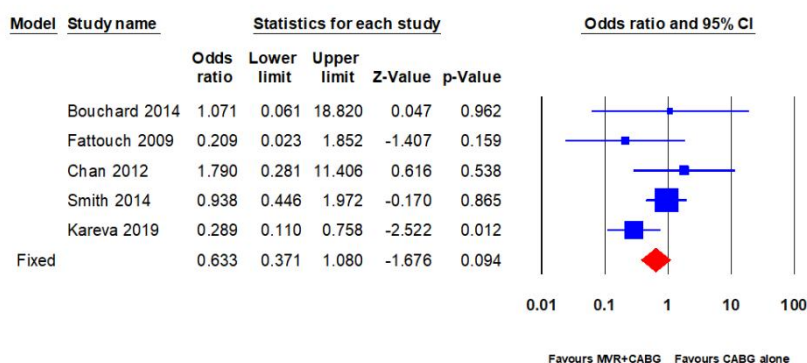

The summary statistic is odds ratio

Figure S14. Plot of sensitivity analysis for long-term mortality. The summary statistic is odds ratio.

### Operative mortality

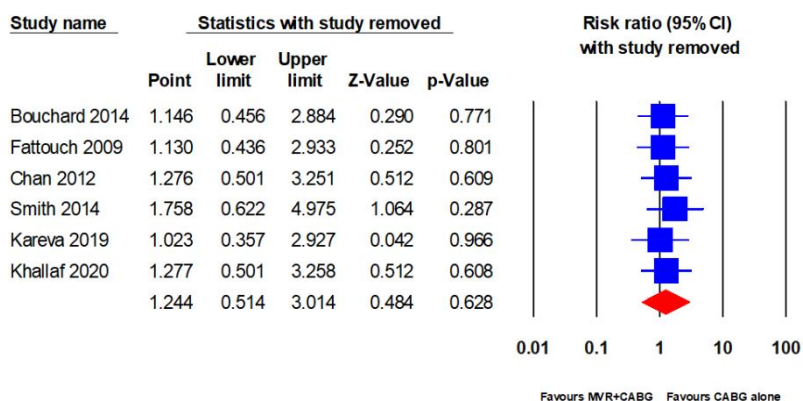

Excluding each included study one by one

Figure S15. Plot of sensitivity analysis for operative mortality. Excluding each included study individually.

### Long-term mortality

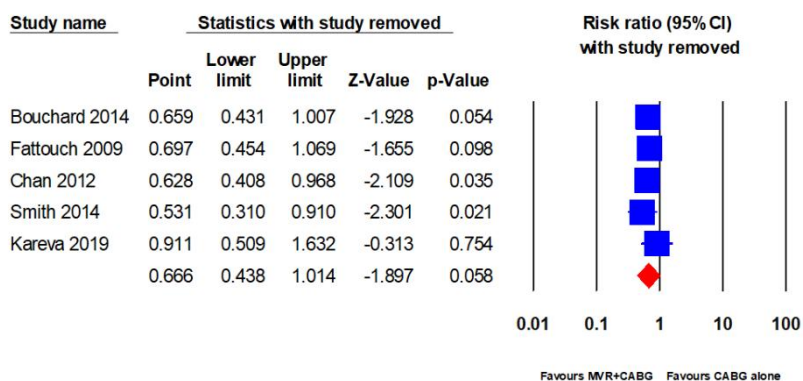

Excluding each included study one by one

Figure S16. Plot of sensitivity analysis for long-term mortality. Excluding each included study individually.

## GRADE assessment

### Summary of findings:

#### MVR + CABG compared to CABG alone for moderate IMR

**Patient or population:** moderate IMR

**Setting:**

**Intervention:** MVR + CABG

**Comparison:** CABG alone

| Outcome<br>№ of participants<br>(studies)                                      | Relative effect<br>(95% CI)      | Anticipated absolute effects (95% CI) |                               |                                              | Certainty                     | What happens |
|--------------------------------------------------------------------------------|----------------------------------|---------------------------------------|-------------------------------|----------------------------------------------|-------------------------------|--------------|
|                                                                                |                                  |                                       |                               | Difference                                   |                               |              |
| <b>Study population</b>                                                        |                                  |                                       |                               |                                              |                               |              |
| Operative mortality<br>№ of participants:<br>626<br>(6 RCTs)                   | <b>RR 1.37</b><br>(0.56 to 3.36) | 2.5%                                  | <b>3.5%</b><br>(1.4 to 8.5)   | <b>0.9% more</b><br>(1.1 fewer to 6 more)    | ⊕⊕⊕○<br>Moderate <sup>a</sup> |              |
|                                                                                |                                  | <b>Moderate</b>                       |                               |                                              |                               |              |
|                                                                                |                                  | 2.2%                                  | <b>3.0%</b><br>(1.2 to 7.4)   | <b>0.8% more</b><br>(1 fewer to 5.2 more)    |                               |              |
| <b>Study population</b>                                                        |                                  |                                       |                               |                                              |                               |              |
| Long-term mortality<br>№ of participants:<br>583<br>(5 RCTs)                   | <b>RR 0.68</b><br>(0.42 to 1.10) | 15.1%                                 | <b>10.3%</b><br>(6.3 to 16.6) | <b>4.8% fewer</b><br>(8.8 fewer to 1.5 more) | ⊕⊕⊕○<br>Moderate <sup>a</sup> |              |
|                                                                                |                                  | <b>Moderate</b>                       |                               |                                              |                               |              |
|                                                                                |                                  | 9.3%                                  | <b>6.3%</b><br>(3.9 to 10.2)  | <b>3.0% fewer</b><br>(5.4 fewer to 0.9 more) |                               |              |
| <b>Study population</b>                                                        |                                  |                                       |                               |                                              |                               |              |
| Stroke<br>№ of participants:<br>484<br>(4 RCTs)                                | <b>RR 2.43</b><br>(0.74 to 7.91) | 1.2%                                  | <b>3.0%</b><br>(0.9 to 9.8)   | <b>1.8% more</b><br>(0.3 fewer to 8.5 more)  | ⊕⊕⊕○<br>Moderate <sup>a</sup> |              |
|                                                                                |                                  | <b>Moderate</b>                       |                               |                                              |                               |              |
|                                                                                |                                  | 0.7%                                  | <b>1.7%</b><br>(0.5 to 5.5)   | <b>1.0% more</b><br>(0.2 fewer to 4.8 more)  |                               |              |
| <b>Study population</b>                                                        |                                  |                                       |                               |                                              |                               |              |
| Worsening renal function<br>№ of participants:<br>479<br>(3 RCTs)              | <b>RR 1.26</b><br>(0.53 to 2.96) | 3.7%                                  | <b>4.7%</b><br>(2 to 11)      | <b>1.0% more</b><br>(1.7 fewer to 7.3 more)  | ⊕⊕⊕○<br>Moderate <sup>a</sup> |              |
|                                                                                |                                  | <b>Moderate</b>                       |                               |                                              |                               |              |
|                                                                                |                                  | 3.7%                                  | <b>4.7%</b><br>(2 to 11)      | <b>1.0% more</b><br>(1.7 fewer to 7.3 more)  |                               |              |
| <b>Study population</b>                                                        |                                  |                                       |                               |                                              |                               |              |
| Reoperation for bleeding or tamponade<br>№ of participants:<br>249<br>(4 RCTs) | <b>RR 1.67</b><br>(0.53 to 5.27) | 3.1%                                  | <b>5.2%</b><br>(1.7 to 16.5)  | <b>2.1% more</b><br>(1.5 fewer to 13.3 more) | ⊕⊕⊕○<br>Moderate <sup>a</sup> |              |
|                                                                                |                                  | <b>Moderate</b>                       |                               |                                              |                               |              |
|                                                                                |                                  | 1.9%                                  | <b>3.2%</b><br>(1 to 10)      | <b>1.3% more</b><br>(0.9 fewer to 8.1 more)  |                               |              |

\*The risk in the intervention group (and its 95% confidence interval) is based on the assumed risk in the comparison group and the **relative effect** of the intervention (and its 95% CI).

CI: confidence interval; RR: risk ratio

#### GRADE Working Group grades of evidence

**High certainty:** we are very confident that the true effect lies close to that of the estimate of the effect.

**Moderate certainty:** we are moderately confident in the effect estimate: the true effect is likely to be close to the estimate of the effect, but there is a possibility that it is substantially different.

**Low certainty:** our confidence in the effect estimate is limited: the true effect may be substantially different from the estimate of the effect.

**Very low certainty:** we have very little confidence in the effect estimate: the true effect is likely to be substantially different from the estimate of effect.

#### Explanations

a. Total number of events is low.

Figure S17. Summary of findings table.

**MVR + CABG compared to CABG alone for moderate IMR**  
 Bibliography: MVR + CABG vs CABG alone for moderate IMR.

| Participants (studies) Follow-up             | Certainty assessment |               |              |                      |                  |                               | Summary of findings   |                 |                                  |                                         |                                                         |
|----------------------------------------------|----------------------|---------------|--------------|----------------------|------------------|-------------------------------|-----------------------|-----------------|----------------------------------|-----------------------------------------|---------------------------------------------------------|
|                                              | Risk of bias         | Inconsistency | Indirectness | Imprecision          | Publication bias | Overall certainty of evidence | Study event rates (%) |                 | Relative effect (95% CI)         | Anticipated absolute effects            |                                                         |
|                                              |                      |               |              |                      |                  |                               | With CABG alone       | With MVR + CABG |                                  | Risk with CABG alone                    | Risk difference with MVR + CABG                         |
| <b>Operative mortality</b>                   |                      |               |              |                      |                  |                               |                       |                 |                                  |                                         |                                                         |
| 626 (6 RCTs)                                 | not serious          | not serious   | not serious  | serious <sup>a</sup> | none             | ⊕⊕⊕○<br>Moderate              | 8/317 (2.5%)          | 11/309 (3.6%)   | <b>RR 1.37</b><br>(0.56 to 3.36) | <b>Study population</b><br>25 per 1,000 | <b>9 more per 1,000</b><br>(from 11 fewer to 60 more)   |
|                                              |                      |               |              |                      |                  |                               |                       |                 |                                  | <b>Moderate</b><br>22 per 1,000         | <b>8 more per 1,000</b><br>(from 10 fewer to 52 more)   |
| <b>Long-term mortality</b>                   |                      |               |              |                      |                  |                               |                       |                 |                                  |                                         |                                                         |
| 583 (5 RCTs)                                 | not serious          | not serious   | not serious  | serious <sup>a</sup> | none             | ⊕⊕⊕○<br>Moderate              | 45/298 (15.1%)        | 30/285 (10.5%)  | <b>RR 0.68</b><br>(0.42 to 1.10) | <b>Study population</b><br>93 per 1,000 | <b>48 fewer per 1,000</b><br>(from 88 fewer to 15 more) |
|                                              |                      |               |              |                      |                  |                               |                       |                 |                                  | <b>Moderate</b><br>151 per 1,000        | <b>30 fewer per 1,000</b><br>(from 54 fewer to 9 more)  |
| <b>Stroke</b>                                |                      |               |              |                      |                  |                               |                       |                 |                                  |                                         |                                                         |
| 484 (4 RCTs)                                 | not serious          | not serious   | not serious  | serious <sup>a</sup> | none             | ⊕⊕⊕○<br>Moderate              | 3/243 (1.2%)          | 9/241 (3.7%)    | <b>RR 2.43</b><br>(0.74 to 7.91) | <b>Study population</b><br>12 per 1,000 | <b>18 more per 1,000</b><br>(from 3 fewer to 85 more)   |
|                                              |                      |               |              |                      |                  |                               |                       |                 |                                  | <b>Moderate</b><br>7 per 1,000          | <b>10 more per 1,000</b><br>(from 2 fewer to 48 more)   |
| <b>Worsening renal function</b>              |                      |               |              |                      |                  |                               |                       |                 |                                  |                                         |                                                         |
| 479 (3 RCTs)                                 | not serious          | not serious   | not serious  | serious <sup>a</sup> | none             | ⊕⊕⊕○<br>Moderate              | 9/243 (3.7%)          | 11/236 (4.7%)   | <b>RR 1.26</b><br>(0.53 to 2.96) | <b>Study population</b><br>37 per 1,000 | <b>10 more per 1,000</b><br>(from 17 fewer to 73 more)  |
|                                              |                      |               |              |                      |                  |                               |                       |                 |                                  | <b>Moderate</b><br>37 per 1,000         | <b>10 more per 1,000</b><br>(from 17 fewer to 73 more)  |
| <b>Reoperation for bleeding or tamponade</b> |                      |               |              |                      |                  |                               |                       |                 |                                  |                                         |                                                         |
| 249 (4 RCTs)                                 | not serious          | not serious   | not serious  | serious <sup>a</sup> | none             | ⊕⊕⊕○<br>Moderate              | 4/128 (3.1%)          | 7/121 (5.8%)    | <b>RR 1.67</b><br>(0.53 to 5.27) | <b>Study population</b><br>31 per 1,000 | <b>21 more per 1,000</b><br>(from 15 fewer to 133 more) |
|                                              |                      |               |              |                      |                  |                               |                       |                 |                                  | <b>Moderate</b><br>19 per 1,000         | <b>13 more per 1,000</b><br>(from 9 fewer to 81 more)   |

CI: confidence interval; RR: risk ratio

**Explanations**

a. Total number of events is low.

**Figure S18. GRADE evidence profile.**
